## RESEARCH ARTICLE

# Coping strategies and psychological distress among mothers during COVID-19 pandemic: The moderating role of social support

Fitriani Yustikasari Lubis<sup>1,2\*</sup>, Fitri Ariyanti Abidin<sup>1,3</sup>, Laila Qodariah<sup>1,3</sup>,  
Vidya Anindhita<sup>1,3</sup>, Fredrick Dermawan Purba<sup>1,2</sup>

**1** Faculty of Psychology, Universitas Padjadjaran, Bandung, Indonesia, **2** Center for Psychological Innovation and Research, Faculty of Psychology, Universitas Padjadjaran, Bandung, Indonesia, **3** Center for Family Life and Parenting Studies, Faculty of Psychology, Universitas Padjadjaran, Bandung, Indonesia

\* [fitriani.y.lubis@unpad.ac.id](mailto:fitriani.y.lubis@unpad.ac.id)

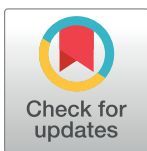

## Abstract

The Indonesian government implemented a large-scale social restriction policy as part of the efforts to tackle the COVID-19 pandemic. This policy impacted the population, including mothers, and caused considerable psychological distress. Individual efforts to cope (avoidant and approach coping strategies) and support from significant persons might help handle the distress experienced by mothers. The purpose of this empirical study is to investigate the effect of individual coping strategies on psychological distress and the moderating role of social support among Indonesian mothers. An online survey was administered from 20<sup>th</sup> to 25<sup>th</sup> April 2020 to 1534 Indonesian mothers (Mean age 37.12 years; SD 6.63). Brief COPE (28 items), Depression Anxiety Stress Scale/DASS (18 items), and the Multidimensional Scale of Perceived Social Support/MSPSS (12 items) were used to measure coping strategies, psychological distress, and social support, respectively. IBM SPSS 24 software was used to analyze the data. The result showed that moderate and high levels of social support moderated the relationship between approach coping strategies and psychological distress ( $B = .041$ ,  $CI .007-.075$ ). When the mother uses approach coping, her psychological distress will decrease further whenever she receives moderate and high level social support. Any level of social support moderated the relationship between avoidant coping and psychological distress ( $B = -.100$ ,  $CI -.138-.061$ ). When mother used avoidant coping, her social support at any level served as buffer to her psychological distress. It can be concluded that mothers need to prioritize implementing approach coping strategies to lower their distress. Those who practiced avoidant coping strategies needed social support from their significant persons to decrease their distress.

## OPEN ACCESS

**Citation:** Lubis FY, Abidin FA, Qodariah L, Anindhita V, Purba FD (2024) Coping strategies and psychological distress among mothers during COVID-19 pandemic: The moderating role of social support. *PLoS ONE* 19(4): e0300365. <https://doi.org/10.1371/journal.pone.0300365>

**Editor:** Omar Mohammad Ali Khraisat, Al-Ahliyya Amman University, JORDAN

**Received:** December 29, 2021

**Accepted:** February 23, 2024

**Published:** April 2, 2024

**Peer Review History:** PLOS recognizes the benefits of transparency in the peer review process; therefore, we enable the publication of all of the content of peer review and author responses alongside final, published articles. The editorial history of this article is available here: <https://doi.org/10.1371/journal.pone.0300365>

**Copyright:** © 2024 Lubis et al. This is an open access article distributed under the terms of the [Creative Commons Attribution License](https://creativecommons.org/licenses/by/4.0/), which permits unrestricted use, distribution, and reproduction in any medium, provided the original author and source are credited.

**Data Availability Statement:** All relevant data are within the paper and its [Supporting Information](#) files.

## Introduction

The mental health status in various countries is greatly impacted by the outbreak of the coronavirus disease 2019 (COVID-19) [1]. Government regulations, including lockdown and

**Funding:** The authors received no specific funding for this work.

**Competing interests:** The authors have declared that no competing interests exist.

quarantine policies, had an adverse effect on mental health of adults around the world as evidenced by an increase in depression and stress-related symptoms [2, 3], increased parental burnout [4], and the level of parent stress that have not returned to pre-COVID-19 levels [5]. Among others, parents have experienced enormous stress by this pandemic. The multifaceted disruptions in various aspects, such as employment, financial stability, children's education, and childcare responsibilities, collectively gave rise to a profound stressor for parents [6]. A preceding investigation indicated that parents encountered elevated stress levels across several areas of their lives, including work (e.g., unemployment, adaptation to remote work arrangements), familial dynamics (e.g., challenges of remote education, the inability to convene in person), relational intricacies (e.g., marital conflicts and limited support), physical well-being (e.g., inadequate sleep), and psychological well-being (e.g., anxiety, depression) [7]. Another study found that parental mental health issues were associated with low material assets (e.g., financial security, food security, children having access to outdoor space), familial assets (e.g., parents' time for themselves), and community assets (e.g., receiving support from others outside the household) in a pandemic [8]. Consequently, it was more challenging to strike a balance between work with parenting during circuit-breakers [9]. The demands were increased for parents of children with developmental delays, chronic emotional or behavioral difficulties, or other health challenges [10].

Among these effects of the COVID-19 pandemic on parenting, a specific and more profound influence had been found in maternal roles [11, 12]. These effects can be exacerbated in working mothers. According to a previous study, co-parenting had affected men and women differently during the pandemic [4]. Furthermore, working mothers spent more time in child-rearing and homeschooling than working fathers during this period [13]. A previous study reported that work arrangements during the pandemic resulted in an unideal merger of work and personal space of working mothers [14].

Based on government regulations regarding large-scale social restrictions in Indonesia, schools have been closed since March 2020 until July 2021. Consequently, learning activities have been changed to online activities, leading to changes in Indonesian mothers' behavior and daily lives. Most mothers reported difficulties dividing their time between nurturing children and working [7, 15]. With the center of life happening at home, the role of mothers became more burdensome. Indonesian mothers are expected to bear the responsibility of childrearing and children's school activities while carrying out domestic chores and taking care of all family members [16, 17].

Exposure to stressors, such as those caused by the pandemic, might cause fatigue and furthermore increase strain on the relationship between parents and their children [18]. The study found that the connection between stressful life events and adverse outcomes (e.g., poor parenting behaviors) influenced how potential stressful situations affected adaptive versus maladaptive functioning [19].

Caregiver well-being is crucial for promoting healthy parenting practices and positive marital relations [20, 21], serving as a funnel through which social disruptions due to COVID-19 can infiltrate family functioning via changes to marital, parent-child, and sibling relations that are influenced by caregiver well-being [22]. Managing stress responses to achieve the desired well-being has not only helped the vulnerable to survive this pandemic, but also improved how they would survive an even more challenging life afterward [23], specifically for mothers.

With an important role as the main caregivers in Indonesia's families, mothers in Indonesia should be able to attain their physical and psychological well-being and manage the stress in parenting due to the COVID-19 pandemic. Therefore, it is important to understand the psychological distress condition of mothers and explore the strategies that may promote their physical and psychological well-being.

## Social support

Perceived control is crucial in understanding stress and coping [24]. Coping has been associated with decreases in stress, anxiety, depression, and better adjustment across situations [25–27]. The use of coping strategies has been found to affect and predict perceived control in facing stressors [28]. Coping strategies such as accepting negative thoughts or experiences without judging them are strongly and negatively associated with perceived stress [29]. The types of coping strategies may also interact differently with stressors. Avoidant coping and religious-focused coping emerged as significant predictors of psychological distress [30]. These types of coping also have positive relationships with depression, anxiety, and stress. Meanwhile, self-efficacy, active-practical coping, and active-distractive coping had negative relationships with psychological distress [31]. This findings also occurred during COVID-19, where coping self-efficacy was associated with lower psychological stress [32].

In dealing with the familial and parental stress caused by the pandemic, besides promoting positive coping strategies, it is also important to enhance social support. Several studies have found the role of social support in psychological distress. Social support, self-efficacy, active-practical coping, and active-distractive coping are negatively associated with psychological distress [33]. Amidst the COVID-19 pandemic, active/adaptive coping strategies and increased social support are significantly correlated with decreased psychological distress [1]. Adaptive coping strategies and supportive family environments may serve as protective factors for families experiencing stress [7]. Perceived social support is negatively correlated with anxiety, depression, and stress, indicating that more social support is associated with less depression and anxiety [30, 31, 33, 34]. Previous studies showed that mothers' perceptions of family support were associated with less parenting stress, meaning parents who received more support were better able to engage in positive parenting [35, 36]. Another study on mediation analysis also showed that self-efficacy mediated the effect of social support on depression, anxiety, and stress [33].

## Relationship between social support, coping strategies, and psychological distress

Several studies consistently showed correlations between social support, coping strategies, and psychological distress. For instance, a previous study showed that coping strategies mediated the relationships between perceived social support and anxiety and depression. That study also stated that more facilitative coping (e.g., seeking help) was linked to less anxiety, while more avoidant coping (e.g., avoiding emotions) was linked to more anxiety and depression [34].

Correspondingly, the mediation analyses study reported that avoidance-focused coping mediated the link between social support and depression and between significant other support and anxiety [33]. These dynamics were explained by Budge, S. L., Rossman, H. K., & Howard, K. A. S. (2014) where people with higher social support engage in more facilitative coping, which was correlated with less anxiety, and those who reported less social support engage in more avoidant coping which was correlated with more anxiety [31].

## Current study

Previous studies have demonstrated coping strategies as a mediating variable in the relationship between social support and psychological distress. However, evidence showing social support as a moderating variable between coping strategies and psychological distress is scarce. The present study attempted to seek the moderating role of social support among Indonesian mothers in coping strategies to deal with psychological distress during the COVID-19 pandemic (see Fig 1).

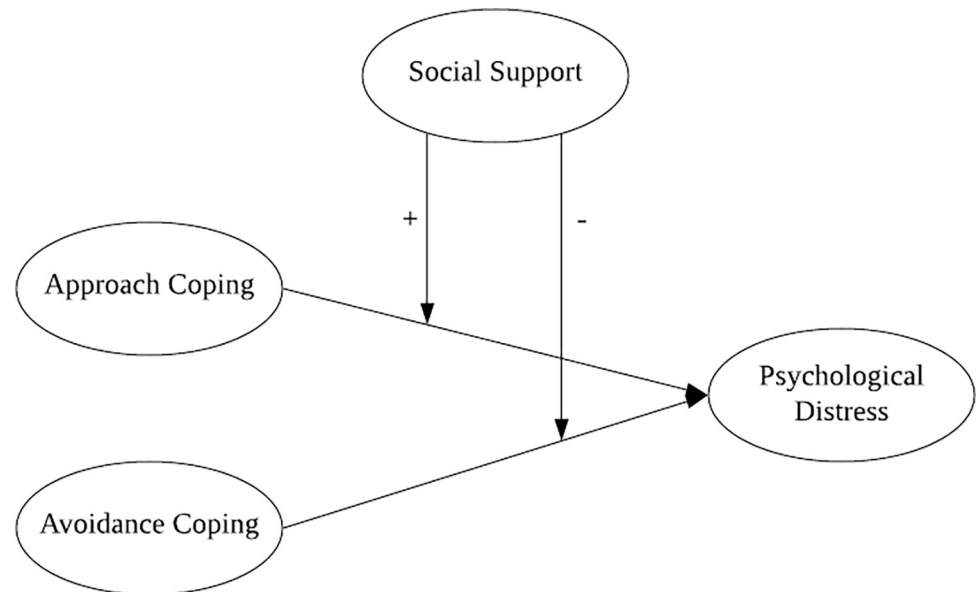

**Fig 1. Conceptual framework of relationship between coping, social support, and psychological distress.**

<https://doi.org/10.1371/journal.pone.0300365.g001>

We hypothesized that:

1. Social support will moderate the relationship between approach coping strategies and psychological distress; the negative relation between approach coping strategies and psychological distress will be stronger for mothers with higher levels of social support.
2. Social support will moderate the relationship between avoidance coping strategies and psychological distress; the positive relation between avoidance coping strategies and psychological distress will be weaker for mothers with higher levels of social support.

## Methods

The present study is part of a longitudinal project investigating the psychological distress of Indonesian mothers and its determinant factors during the COVID-19 pandemic. Only data from the first data collection time point was presented, using a cross-sectional approach. The moderating role of social support was investigated in the relation between individual coping strategies and psychological distress among mothers.

## Participants

The population of this study was Indonesian mothers with children who had to follow large-scale social restrictions implemented by the local and national governments. Inclusion criteria were (i) female, (ii) at least 18 years and older, (iii) has at least one child aged younger than 18 years, (iv) the children lived in the same address as mothers. A convenience sampling method was used to obtain data from the population above.

## Procedures

Data collection was conducted from April 20<sup>th</sup> to 25<sup>th</sup>, 2021. The study team shared the Google Form survey link through their network (e.g., parent community at schools, neighborhood community), instant messenger applications (e.g., Whatsapp, Line), and social media (e.g., Instagram,

Facebook). Informed consent was presented and sent through a link to participants. Participants clicked “agree” on the form when willing to participate, otherwise “disagree” was clicked. For participants who are willing to participate, the form would automatically enter the next section, which consist of three measurement tools. Meanwhile, for participants who were not willing to participate, the form will go directly to the closing section. Ethical clearance was obtained from Universitas Padjadjaran Ethical Committee (No. 486/UN6.KEP/EC/2020).

## Measures

A total of four questionnaires were used, namely demographic, Brief COPE, Depression Anxiety Stress Scale/DASS, and the Multidimensional Scale of Perceived Social Support/MSPSS.

Demographic data collected were personal information (i.e., age, education, length of the marriage, number of children, location of residence), information on the spouse (i.e., age, education), and pandemic-related characteristics (i.e., working situation, having a housekeeper, knowing someone in the neighborhood who tested positive for COVID-19).

**Coping strategy.** Coping strategies were measured using Brief COPE which is a shorter version of the COPE (Coping Orientation to Problem Experienced) inventory [37]. The instrument consists of a 28-item self-report inventory that includes statements indicating the specific strategies for individuals. It measures 14 coping strategies divided into two categories, namely approach coping (“I have been concentrating my efforts on doing something about the situation I am in”) and avoidance coping (“I have been criticizing myself”) [38]. A total of 14 items indicate each category and participants responded using a Likert scale from 1 for “I have not been doing this at all” to 4 for “I have been doing this a lot” to indicate how frequently the specific coping strategy are used [39]. Higher scores showed the increased practice of the specific coping strategies. The internal consistency in this study was .853 and .723 for approach and avoidance coping, respectively.

**Perceived social support.** Perceived social support was measured by the Multidimensional Scale of Perceived Social Support (MSPSS), which is a 14-item self-report measure drafted by Zimet et al. (1988) [40]. Items include statements regarding parties who may provide social support to the individual (i.e., family, friends, and significant others), such as “I can talk about my problem with my friends”. Participants responded using a Likert scale from 1 for “strongly disagree” to 7 for “strongly agree” to indicate their level of agreement toward the social support received [40]. This scale has been psychometrically validated in the Indonesian language [41]. The higher score indicated higher social support. The internal consistency of the MSPSS in the present sample was .88, .87, and .85 for family, friends, and significant others, respectively.

**Psychological distress.** Mothers’ psychological distress is measured by the Depression Anxiety Stress Scale (DASS), which is an 18-item self-report inventory aimed to measure the presence and severity of symptoms of depression (7 items), anxiety (7 items), and stress (4 items) with a recall period of the previous seven days. An example of the DASS-18 item is “I found it difficult to relax”. The response options ranged from 1 for “Did not apply to me at all” to 3 for “Applied to me very much or most of the time”. Furthermore, DASS-18 has been validated for the Indonesian population [42]. The higher the score, the more severe the psychological distress. The internal consistency of the domains in the present sample were .82, .75, and .75 for the depression, anxiety, and stress domain, respectively.

## Data analysis

Descriptive data were presented in mean and standard deviations of variables. Pearson’s correlational analyses were conducted to examine bivariate relationships between psychological

distress, social support, and coping strategies. After testing the assumptions, this data met the minimum criteria for conducting a moderating analysis using regression (normal distribution, Linearity, Homoscedasticity, Multicollinearity) [43]. For testing the potential moderator, moderated regression model was used through PROCESS analysis (v.3) with 5000 bootstrap samples and heteroscedasticity-consistent standard errors [44]. PROCESS is a conditional process modeling program that makes use of an ordinary least squares or logistic-based path analytical framework to test the moderation effect [45]. Social support was used as the moderator variable (W), psychological distress as the independent variable (X), and approach coping strategies (Y1) and avoidance coping strategies (Y2) as the dependent variables. A total of two separate models were examined to predict that (1) Social support increases the negative association between approach coping and psychological distress and (2) Social support decreases the positive association between avoidance coping and psychological distress. The moderator effect for the two-interaction term indicates a significant moderator effect  $p < .05$  and 95% of the level confidence interval (CI). IBM SPSS 24 software was used to analyze the data.

## Results

A total of 136 were excluded from 1670 participants who completed the survey due to invalid answers, aged under 18, and had no child. The final sample was 1534 participants with a mean age of 37.1 years ( $SD = 6.6$ ). The majority of participants completed their university-level education (84.4%), had a spouse with a university degree (81.23%), lived on Java Island (87.6%), had two children (41.3%), and had no housekeeper to help at their house (62.9%, as shown in [Table 1](#)).

Descriptive data for approach coping, avoidance coping, social support, and psychological distress domain scores are shown in [Table 2](#). The results showed that approach coping, avoidance coping, and social support were significantly related to the psychological distress experienced by mothers, and the correlation coefficients were  $-.284$  to  $.578$ . Positive associations were found between approach and avoidance coping as well as social support and between avoidance coping with psychological distress. Meanwhile, negative associations were found between avoidance coping with social support and between psychological distress with approach coping and social support.

Moderation effects were analyzed using PROCESS with 5000 bootstrap samples and heteroscedasticity-consistent standard errors with psychological distress as the outcome variable. In [Table 3](#), social support negatively affected psychological distress ( $B = -.241$ , 95% CI  $-.342, -.142$ ) and served as a moderator in the relationship between approach coping strategies and psychological distress ( $B = .041$ , 95% CI  $.007, -.075$ ). Other moderating effects occurred only when the social support level was moderate ( $B = .053$ , 95% CI  $.014, .091$ ) or high ( $B = .093$ , 95% CI  $.041, .144$ ). In addition, with moderate or high social support as a moderator, the approach coping strategies became insignificant toward psychological distress ( $B = -.161$ , 95% CI  $-.359, .021$ ). See [Table 4](#).

Unlike the approach coping strategies, the inclusion of social support served as a moderator in the relationship between avoidance coping strategies and psychological distress ( $B = -.100$ , 95% CI  $-.138, -.061$ ), as seen in [Table 5](#). The relationship between avoidance coping and psychological distress was significant at one standard deviation below the mean social support score ( $B = .684$ , 95% CI  $.925, 1.336$ ), at the mean social support score ( $B = .586$ , 95% CI  $.542, .628$ ), and at one standard deviation above the mean social support score ( $B = .487$ , 95% CI  $.425, .549$ ). The negative effects of avoidance coping strategies are weaker toward psychological distress when social support moderates. See [Table 6](#).

**Table 1. Demographic and life during pandemic characteristics (N = 1534).**

| Characteristics                                         | Mean     | SD       |
|---------------------------------------------------------|----------|----------|
| Age                                                     | 37.12    | 6.63     |
| Age of spouse <sup>a</sup>                              | 39.36    | 7.19     |
| Length of marriage                                      | 11.3     | 6.19     |
| Number of children                                      | 2.11     | 0.94     |
|                                                         | <b>n</b> | <b>%</b> |
| <b>Education</b>                                        |          |          |
| Junior high school or below                             | 6        | 0.39     |
| Senior high school                                      | 85       | 5.54     |
| Diploma                                                 | 149      | 9.71     |
| University                                              | 1294     | 84.35    |
| <b>Spouse's education</b>                               |          |          |
| Junior high school or below                             | 12       | 0.8      |
| Senior high school                                      | 137      | 9.18     |
| Diploma                                                 | 131      | 8.78     |
| University                                              | 1212     | 81.23    |
| <b>Location of residence</b>                            |          |          |
| Java Island                                             | 1340     | 87.35    |
| Outside Java Island                                     | 157      | 10.23    |
| Overseas                                                | 37       | 2.41     |
| <b>Working arrangement</b>                              |          |          |
| Not working (housewife)                                 | 745      | 48.57    |
| Work from office (WFO)                                  | 80       | 5.21     |
| Work from home (WFH)                                    | 532      | 34.68    |
| Shift (WFO & WFH)                                       | 177      | 11.54    |
| <b>Helped by a housekeeper</b>                          |          |          |
| Yes                                                     | 569      | 37.09    |
| No                                                      | 965      | 62.91    |
| <b>Know someone who is COVID-19 positive</b>            |          |          |
| Yes                                                     | 257      | 16.75    |
| No                                                      | 1277     | 83.25    |
| <b>Someone in the neighborhood is COVID-19 positive</b> |          |          |
| Yes                                                     | 600      | 39.11    |
| No                                                      | 934      | 60.89    |

<sup>a</sup> There were 42 participants who had no spouse (because of divorce or any other reason); therefore, the number of spouses was 1492.

<https://doi.org/10.1371/journal.pone.0300365.t001>

## Discussion

This present study investigated the moderating role of social support on the relationship between coping strategies and psychological distress during the COVID-19 pandemic in Indonesia. We found that approach and avoidance coping strategies showed different interactions with social support and psychological distress. Moreover, social support served as a moderator between the two types of coping and psychological distress among Indonesian mothers are significantly associated.

The results of this study are in line with previous research [25–28], where approach coping strategies and psychological distress were negatively associated. Approach coping strategies consisted of active coping, emotional support, instrumental support, positive reframing,

**Table 2. Descriptive and intercorrelation between approach coping strategy, avoidance coping strategy, social support and psychological distress (N = 1534).**

|                        | Mean (SD)  | Approach Coping | Avoidance Coping | Social Support | Psychological distress |
|------------------------|------------|-----------------|------------------|----------------|------------------------|
| Approach Coping        | 3.00 (.53) | -               | -                | -              | -                      |
| Avoidance Coping       | 1.84 (.36) | .348            | -                | -              | -                      |
| Social Support         | 5.48 (.98) | .407            | -.095            | -              | -                      |
| Psychological distress | 0.54 (.39) | -.056           | .578             | -.284          | -                      |

All correlations are statistically significant; P-value < .05

<https://doi.org/10.1371/journal.pone.0300365.t002>

planning, acceptance, and religious strategies [39]. Moreover, medium and high levels of social support moderated the relationship between approach coping strategies and psychological distress. The results align with previous research where using approach coping strategies and social support significantly correlated with decreased psychological distress [1, 7]. The two implications from these results are (i) the importance of equipping and promoting mothers with various approach coping strategies; (ii) the importance of mothers' significant persons (i.e., spouse, family members, friends, coworkers) to providing an abundance of social support for mothers, specifically in the time of worldwide crises such as the COVID-19 pandemic. Previous studies showed that parental burnout increased during the pandemic [4], and the level of parent stress has not returned to pre-COVID-19 levels [5]. At least a moderate level of social support was needed since low social support did not contribute to decreasing psychological distress [31, 46].

A positive association was also found between avoidance coping strategies and psychological distress, which supported previous studies [29, 30]. Avoidance coping strategies included self-distraction, denial, substance use, behavioral disengagement, venting, self-blame, and humor [39]. At any level, social support can moderate the relationship between avoidance coping strategies and psychological distress. The results were supported by several previous studies where avoidance coping was linked to more anxiety and depression and had a role as a predictor for psychological distress [30, 34]. Social support was identified as a buffering or protective

**Table 3. Social support moderation effect between approach coping strategy and psychological distress.**

| Predictor                        | $\beta$ | p     | 95%CI  |       |
|----------------------------------|---------|-------|--------|-------|
|                                  |         |       | lower  | upper |
| Approach Coping                  | -.161   | .081  | -.359, | .021  |
| Social Support                   | -.241   | .000* | -.342, | -.142 |
| Approach Coping x Social Support | .041    | .020* | .007,  | .075  |

\*P-value < .05

<https://doi.org/10.1371/journal.pone.0300365.t003>

**Table 4. Conditional effects of approach coping on psychological distress.**

| Social Support | $\beta$ | p     | 95%CI  |       |
|----------------|---------|-------|--------|-------|
|                |         |       | lower  | upper |
| Low Effect     | .013    | .621  | -.038, | .064  |
| Medium Effect  | .053    | .007* | .014,  | .091  |
| High Effect    | .093    | .000* | .041,  | .144  |

\*P-value < .05

<https://doi.org/10.1371/journal.pone.0300365.t004>



**Table 5. Social support moderation effect between avoidance coping strategy and psychological distress.**

| Predictor                         | $\beta$ | <i>p</i> | 95%CI  |       |
|-----------------------------------|---------|----------|--------|-------|
|                                   |         |          | lower  | upper |
| Avoidance Coping                  | 1.130   | .000*    | .925,  | 1.336 |
| Social Support                    | .098    | .010*    | .023,  | .173  |
| Avoidance Coping x Social Support | -.100   | .000*    | -.138, | -.061 |

\*P-value &lt; .05

<https://doi.org/10.1371/journal.pone.0300365.t005>**Table 6. Conditional effects of avoidance coping on psychological distress.**

| Social Support | $\beta$ | <i>p</i> | 95%CI |       |
|----------------|---------|----------|-------|-------|
|                |         |          | lower | upper |
| Low Effect     | .684    | .000*    | .632, | .736  |
| Medium Effect  | .586    | .000*    | .542, | .628  |
| High Effect    | .487    | .000*    | .425, | .549  |

\*P-value &lt; .05

<https://doi.org/10.1371/journal.pone.0300365.t006>

source of distress and psychosocial adjustment [47]. The results were also in line with a previous study where people who lack social support were more likely to engage in avoidance coping [31] and the variable was negatively associated with psychological distress [33]. These findings highlighted that even though mothers practice avoidance coping strategies to increase their psychological distress, the support received from their significant persons were helpful in the buffer of stress experienced.

Several limitations of the present study should be considered. The nature of online data collection might hinder the diversity of samples. Our samples were mostly based in Java Island, and more than half of the participants had a university education background. Thus, the generalization to other sample characteristics should be done cautiously. Future study that reaches wider population groups (e.g., live outside of Java, lower education) is warranted. We acknowledge that the age of the child could potentially be an influential factor to stress anxiety and depression levels. However, in this particular study, we did not collect data on the children's age.

## Conclusion

During the COVID-19 pandemic, social support was negatively associated with psychological distress among mothers in Indonesia. Family, friends, and significant others must support mothers in dealing with various psychological distress. The most important thing for a mother is not the amount and availability of social support, but rather the mother's ability to perceive social support as beneficial for her in this difficult situation.

## Supporting information

**S1 Data.**  
(XLSX)

**S1 File.**  
(PDF)

## Author Contributions

**Conceptualization:** Fitriani Yustikasari Lubis, Fitri Ariyanti Abidin, Laila Qodariah, Vidya Anindhita, Fredrick Dermawan Purba.

**Data curation:** Fitriani Yustikasari Lubis, Fitri Ariyanti Abidin, Laila Qodariah, Vidya Anindhita, Fredrick Dermawan Purba.

**Formal analysis:** Fitriani Yustikasari Lubis, Fitri Ariyanti Abidin.

**Investigation:** Fitriani Yustikasari Lubis, Fitri Ariyanti Abidin, Vidya Anindhita.

**Methodology:** Fitriani Yustikasari Lubis, Fitri Ariyanti Abidin, Laila Qodariah, Vidya Anindhita, Fredrick Dermawan Purba.

**Project administration:** Fitriani Yustikasari Lubis, Fitri Ariyanti Abidin, Laila Qodariah.

**Supervision:** Fitriani Yustikasari Lubis.

**Writing – original draft:** Fitriani Yustikasari Lubis, Fitri Ariyanti Abidin, Laila Qodariah, Vidya Anindhita, Fredrick Dermawan Purba.

**Writing – review & editing:** Fitriani Yustikasari Lubis, Fitri Ariyanti Abidin, Laila Qodariah, Vidya Anindhita, Fredrick Dermawan Purba.

## References

1. Yu H, Li M, Li Z, Xiang W, Yuan Y, Liu Y, et al. Coping style, social support and psychological distress in the general Chinese population in the early stages of the COVID-19 epidemic. *BMC Psychiatry*. 2020; 20: 426. <https://doi.org/10.1186/s12888-020-02826-3> PMID: 32854656
2. Alzueta E, Perrin P, Baker FC, Caffarra S, Ramos-Usuga D, Yuksel D, et al. How the COVID-19 pandemic has changed our lives: A study of psychological correlates across 59 countries. *J Clin Psychol*. 2021; 77: 556–570. <https://doi.org/10.1002/jclp.23082> PMID: 33128795
3. Burke T, Berry A, Taylor LK, Stafford O, Murphy E, Shevlin M, et al. Increased Psychological Distress during COVID-19 and Quarantine in Ireland: A National Survey. *J Clin Med*. 2020; 9: 3481. <https://doi.org/10.3390/jcm9113481> PMID: 33126707
4. Bastiaansen C, Verspeek E, van Bakel H. Gender Differences in the Mitigating Effect of Co-Parenting on Parental Burnout: The Gender Dimension Applied to COVID-19 Restrictions and Parental Burnout Levels. *Soc Sci*. 2021; 10: 127. <https://doi.org/10.3390/socsci10040127>
5. Adams EL, Smith D, Caccavale LJ, Bean MK. Parents Are Stressed! Patterns of Parent Stress Across COVID-19. *Front Psychiatry*. 2021; 12. <https://doi.org/10.3389/fpsy.2021.626456> PMID: 33897489
6. Feinberg ME, A. Mogle J, Lee J, Tornello SL, Hostetler ML, Cifelli JA, et al. Impact of the COVID-19 Pandemic on Parent, Child, and Family Functioning. *Fam Process*. 2022; 61: 361–374. <https://doi.org/10.1111/famp.12649> PMID: 33830510
7. Brown SM, Doom JR, Lechuga-Peña S, Watamura SE, Koppels T. Stress and parenting during the global COVID-19 pandemic. *Child Abuse Negl*. 2020; 110: 104699. <https://doi.org/10.1016/j.chiabu.2020.104699> PMID: 32859394
8. Whitaker L, Cameron C, Hauari H, Hollingworth K, O'Brien M. What Family Circumstances, During COVID-19, Impact on Parental Mental Health in an Inner City Community in London? *Front Psychiatry*. 2021; 12. <https://doi.org/10.3389/fpsy.2021.725823> PMID: 34975559
9. Chung GSK, Chan XW, Lanier P, Wong PYJ. Associations between Work–Family Balance, Parenting Stress, and Marital Conflicts during COVID-19 Pandemic in Singapore. *J Child Fam Stud*. 2023; 32: 132–144. <https://doi.org/10.1007/s10826-022-02490-z> PMID: 36408446
10. Coyne LW, Gould ER, Grimaldi M, Wilson KG, Baffuto G, Biglan A. First Things First: Parent Psychological Flexibility and Self-Compassion During COVID-19. *Behav Anal Pract*. 2021; 14: 1092–1098. <https://doi.org/10.1007/s40617-020-00435-w> PMID: 32377315
11. Guerrazi A, Guerrazi F, Bouhamed M, Ben Abdallah M, Baati I, Masmoudi J. Tunisian mothers facing the covid-19 pandemic: what are the risks for their mental health? *European Psychiatry*. 2022; 65: S505–S506. <https://doi.org/10.1192/j.eurpsy.2022.1286>

12. Marchetti D, Fontanesi L, Mazza C, Di Giandomenico S, Roma P, Verrocchio MC. Parenting-Related Exhaustion During the Italian COVID-19 Lockdown. *J Pediatr Psychol*. 2020; 45: 1114–1123. <https://doi.org/10.1093/jpepsy/jsaa093> PMID: 33068403
13. Ferguson D. 'I feel like a 1950s housewife': how lockdown has exposed the gender divide. In: *The Guardian* [Internet]. 3 May 2020 [cited 1 Aug 2023]. Available: <https://www.theguardian.com/world/2020/may/03/i-feel-like-a-1950s-housewife-how-lockdown-has-exposed-the-gender-divide>
14. Burk BN, Pechenik Mausolf A, Oakleaf L. Pandemic Motherhood and the Academy: A Critical Examination of the Leisure-Work Dichotomy. *Leis Sci*. 2021; 43: 225–231. <https://doi.org/10.1080/01490400.2020.1774006>
15. Kumampung DR. Perubahan Perilaku Para Ibu di Indonesia Selama Pandemi Corona. In: *Jakarta: Kompas.com* [Internet]. 22 Apr 2020 [cited 1 Aug 2023]. Available: Available from <https://lifestyle.kompas.com/read/2020/04/22/165311220/perubahan-perilaku-para-ibu-di-indonesia-selama-pandemi-corona>
16. Priyatna A. Negotiating and Rethinking Local Culture: The Narratives of Indonesian Women Juggling Higher Education, Work, and Domestic Roles. *Asian J Women Stud*. 2013; 19: 95–123. <https://doi.org/10.1080/12259276.2013.11666167>
17. Syakriah A. COVID-19 pandemic forces Indonesian mothers to do it all. In: *Jakarta: Jakarta Post* [Internet]. 21 Apr 2020 [cited 1 Aug 2023]. Available: <https://www.thejakartapost.com/news/2020/04/21/covid-19-pandemic-forces-indonesian-mothers-to-do-it-all.html>
18. Deater-Deckard K. *Parenting Stress*. Yale University Press; 2004. <https://doi.org/10.12987/yale/9780300103939.001.0001>
19. Cohen S, Kamarck T, Mermelstein R. A Global Measure of Perceived Stress. *J Health Soc Behav*. 1983; 24: 385. <https://doi.org/10.2307/2136404> PMID: 6668417
20. Abidin RR, Jenkins CL, McGaughey MC. The Relationship of Early Family Variables to Children's Subsequent Behavioral Adjustment. *J Clin Child Psychol*. 1992; 21: 60–69. [https://doi.org/10.1207/s15374424jccp2101\\_9](https://doi.org/10.1207/s15374424jccp2101_9)
21. Karney BR, Bradbury TN. The longitudinal course of marital quality and stability: A review of theory, methods, and research. *Psychol Bull*. 1995; 118: 3–34. <https://doi.org/10.1037/0033-2909.118.1.3> PMID: 7644604
22. Conger RD, Ge X, Elder GH, Lorenz FO, Simons RL. Economic Stress, Coercive Family Process, and Developmental Problems of Adolescents. *Child Dev*. 1994; 65: 541. <https://doi.org/10.2307/1131401> PMID: 8013239
23. Okri B. Fear of COVID-19 is a mental contagion—and that's something we can fight. In: *The Guardian* [Internet]. 26 Mar 2020 [cited 1 Aug 2023]. Available: <https://www.theguardian.com/commentisfree/2020/mar/26/fear-of-covid-19-is-a-mental-contagion-ben-okri>
24. Dijkstra MTM, Homan AC. Engaging in Rather than Disengaging from Stress: Effective Coping and Perceived Control. *Front Psychol*. 2016; 7. <https://doi.org/10.3389/fpsyg.2016.01415> PMID: 27708603
25. Ballash NG, Pemble MK, Usui WM, Buckley AF, Woodruff-Borden J. Family functioning, perceived control, and anxiety: A mediational model. *J Anxiety Disord*. 2006; 20: 486–497. <https://doi.org/10.1016/j.janxdis.2005.05.002> PMID: 16005603
26. Frazier P, Tashiro T, Berman M, Steger M, Long J. Correlates of Levels and Patterns of Positive Life Changes Following Sexual Assault. *J Consult Clin Psychol*. 2004; 72: 19–30. <https://doi.org/10.1037/0022-006X.72.1.19> PMID: 14756611
27. Grote NK, Bledsoe SE, Larkin J, Lemay EP, Brown C. Stress Exposure and Depression in Disadvantaged Women: The Protective Effects of Optimism and Perceived Control. *Soc Work Res*. 2007; 31: 19–33. <https://doi.org/10.1093/swr/31.1.19>
28. Riddle DL, Jensen MP, Ang D, Slover J, Perera R, Dumenci L. Do Pain Coping and Pain Beliefs Associate With Outcome Measures Before Knee Arthroplasty in Patients Who Catastrophize About Pain? A Cross-sectional Analysis From a Randomized Clinical Trial. *Clin Orthop Relat Res*. 2018; 476: 778–786. <https://doi.org/10.1007/s11999-0000000000000001> PMID: 29543659
29. Donald JN, Atkins PWB. Mindfulness and Coping with Stress: Do Levels of Perceived Stress Matter? *Mindfulness (N Y)*. 2016; 7: 1423–1436. <https://doi.org/10.1007/s12671-016-0584-y>
30. Vungkhanching M, Tonsing JC, Tonsing KN. Psychological Distress, Coping and Perceived Social Support in Social Work Students. *Br J Soc Work*. 2016; bcw145. <https://doi.org/10.1093/bjsw/bcw145>
31. Budge SL, Rossman HK, Howard KAS. Coping and Psychological Distress Among Genderqueer Individuals: The Moderating Effect of Social Support. *J LGBT Issues Couns*. 2014; 8: 95–117. <https://doi.org/10.1080/15538605.2014.853641>

32. Shahrour G, Dardas LA. Acute stress disorder, coping self-efficacy and subsequent psychological distress among nurses amid COVID-19. *J Nurs Manag.* 2020; 28: 1686–1695. <https://doi.org/10.1111/jonm.13124> PMID: 32767827
33. Khalid A, Dawood S. Social support, self-efficacy, cognitive coping and psychological distress in infertile women. *Arch Gynecol Obstet.* 2020; 302: 423–430. <https://doi.org/10.1007/s00404-020-05614-2> PMID: 32458132
34. Kim M-Y, Johnson JL, Sawatzky R. Relationship Between Types of Social Support, Coping Strategies, and Psychological Distress in Individuals Living With Congenital Heart Disease. *Journal of Cardiovascular Nursing.* 2019; 34: 76–84. <https://doi.org/10.1097/JCN.0000000000000531> PMID: 30303892
35. Deater-Deckard K. Parenting stress and child adjustment: Some old hypotheses and new questions. *Clinical psychology: Science and practice.* 1998; 5: 314–332. <https://doi.org/10.1111/j.1468-2850.1998.tb00152.x>
36. Sanders MR, Kirby JN, Tellegen CL, Day JJ. The Triple P-Positive Parenting Program: A systematic review and meta-analysis of a multi-level system of parenting support. *Clin Psychol Rev.* 2014; 34: 337–357. <https://doi.org/10.1016/j.cpr.2014.04.003> PMID: 24842549
37. Baumstarck K, Alessandrini M, Hamidou Z, Auquier P, Leroy T, Boyer L. Assessment of coping: a new french four-factor structure of the brief COPE inventory. *Health Qual Life Outcomes.* 2017; 15: 8. <https://doi.org/10.1186/s12955-016-0581-9> PMID: 28077139
38. Allen MT. An exploration of the relationships of experiential avoidance (as measured by the aaq-ii and meaq) with negative affect, perceived stress, and avoidant coping styles. *PeerJ.* 2021; 9: e11033. <https://doi.org/10.7717/peerj.11033> PMID: 33717714
39. Carver CS, Scheier MF, Weintraub JK. Assessing coping strategies: A theoretically based approach. *J Pers Soc Psychol.* 1989; 56: 267–283. <https://doi.org/10.1037//0022-3514.56.2.267> PMID: 2926629
40. Zimet GD, Dahlem NW, Zimet SG, Farley GK. The Multidimensional Scale of Perceived Social Support. *J Pers Assess.* 1988; 52: 30–41. [https://doi.org/10.1207/s15327752jpa5201\\_2](https://doi.org/10.1207/s15327752jpa5201_2)
41. Winahyu KM, Hemchayat M, Charoensuk S. Factors affecting quality of life among family caregivers of patients with schizophrenia in Indonesia. *J Health Res.* 2015; 29: S77–82. <https://doi.org/10.14456/jhr.2015.52>
42. Oei TPS, Sawang S, Goh YW, Mukhtar F. Using the Depression Anxiety Stress Scale 21 (DASS-21) across cultures. *International Journal of Psychology.* 2013; 48: 1018–1029. <https://doi.org/10.1080/00207594.2012.755535> PMID: 23425257
43. Flatt C, Jacobs RL. Principle Assumptions of Regression Analysis: Testing, Techniques, and Statistical Reporting of Imperfect Data Sets. *Adv Dev Hum Resour.* 2019; 21: 484–502. <https://doi.org/10.1177/1523422319869915>
44. Hayes AF. PROCESS: A versatile computational tool for observed variable mediation, moderation, and conditional process modeling. 2012 [cited 1 Aug 2023]. Available: <http://www.afhayes.com/public/process2012.pdf>
45. Hayes AF. Partial, conditional, and moderated moderated mediation: Quantification, inference, and interpretation. *Commun Monogr.* 2018; 85: 4–40. <https://doi.org/10.1080/03637751.2017.1352100>
46. Bhui K, Silva MJ, Harding S, Stansfeld S. Bullying, Social Support, and Psychological Distress: Findings From RELACHS Cohorts of East London's White British and Bangladeshi Adolescents. *Journal of Adolescent Health.* 2017; 61: 317–328. <https://doi.org/10.1016/j.jadohealth.2017.03.009> PMID: 28587795
47. Schulz U, Schwarzer R. Long-Term Effects of Spousal Support on Coping with Cancer After Surgery. *J Soc Clin Psychol.* 2004; 23: 716–732. <https://doi.org/10.1521/jscp.23.5.716.50746>
